# Supplementary material for: Assessment of the Carotid Bodies in Magnetic Resonance—A Head-to-Head Comparison with Computed Tomography
Source: MDPI journal article supplement (doi:10.3390/diagnostics13050993), 2023-03-05
Supplement: s1 [file s1]

## ROC Data Input

Data Format: Frequency Table  
Number of Rating Categories: 6

|    |   |    |    |    |    |
|----|---|----|----|----|----|
| 18 | 0 | 0  | 6  | 2  | 2  |
| 0  | 2 | 11 | 25 | 56 | 81 |

## ROC Results

JROCFIT:

Maximum likelihood estimation of a binormal ROC curve from categorical rating data.

### DATA CHARACTERISTICS:

Data collected in 6 categories with category 6 representing strongest evidence of positivity (e.g., that abnormality is present).

Number of actually negative cases = 28

Number of actually positive cases = 175

### RESPONSE DATA:

|                         |    |   |    |    |    |    |
|-------------------------|----|---|----|----|----|----|
| Category                | 1  | 2 | 3  | 4  | 5  | 6  |
| Actually negative cases | 18 | 0 | 0  | 6  | 2  | 2  |
| Actually positive cases | 0  | 2 | 11 | 25 | 56 | 81 |

### OBSERVED OPERATING POINTS:

|      |        |        |        |        |        |        |        |
|------|--------|--------|--------|--------|--------|--------|--------|
| FPF: | 0.0000 | 0.0714 | 0.1429 | 0.3571 | 0.3571 | 0.3571 | 1.0000 |
| TPF: | 0.0000 | 0.4629 | 0.7829 | 0.9257 | 0.9886 | 1.0000 | 1.0000 |

### INITIAL VALUES OF PARAMETERS:

A = 2.7086

B = 1.9125

Z(K): 0.1657 0.2657 0.3657 1.0676 1.4655

LOGL = -262.5308

### FINAL VALUES OF PARAMETERS:

Procedure converges after 9 iterations.

A = 3.3401

B = 2.6052

Z(K): 0.3258 0.4488 0.6926 0.9835 1.3198

LOGL = -249.4229

### VARIANCE-COVARIANCE MATRIX:

|      |        |         |        |        |         |         |         |
|------|--------|---------|--------|--------|---------|---------|---------|
| A    | 0.7417 | 0.5378  | 0.1707 | 0.1646 | 0.1329  | 0.0794  | 0.0123  |
| B    | 0.5378 | 0.7882  | 0.0666 | 0.0485 | -0.0081 | -0.0907 | -0.1904 |
| Z(1) | 0.1707 | 0.0666  | 0.0580 | 0.0542 | 0.0477  | 0.0403  | 0.0318  |
| Z(2) | 0.1646 | 0.0485  | 0.0542 | 0.0560 | 0.0505  | 0.0449  | 0.0386  |
| Z(3) | 0.1329 | -0.0081 | 0.0477 | 0.0505 | 0.0543  | 0.0542  | 0.0550  |
| Z(4) | 0.0794 | -0.0907 | 0.0403 | 0.0449 | 0.0542  | 0.0653  | 0.0763  |
| Z(5) | 0.0123 | -0.1904 | 0.0318 | 0.0386 | 0.0550  | 0.0763  | 0.1013  |

### CORRELATION MATRIX:

|      |        |         |        |        |         |         |         |
|------|--------|---------|--------|--------|---------|---------|---------|
| A    | 1.0000 | 0.7034  | 0.8229 | 0.8075 | 0.6625  | 0.3607  | 0.0450  |
| B    | 0.7034 | 1.0000  | 0.3114 | 0.2306 | -0.0391 | -0.3997 | -0.6738 |
| Z(1) | 0.8229 | 0.3114  | 1.0000 | 0.9508 | 0.8502  | 0.6552  | 0.4149  |
| Z(2) | 0.8075 | 0.2306  | 0.9508 | 1.0000 | 0.9152  | 0.7419  | 0.5126  |
| Z(3) | 0.6625 | -0.0391 | 0.8502 | 0.9152 | 1.0000  | 0.9110  | 0.7418  |
| Z(4) | 0.3607 | -0.3997 | 0.6552 | 0.7419 | 0.9110  | 1.0000  | 0.9375  |
| Z(5) | 0.0450 | -0.6738 | 0.4149 | 0.5126 | 0.7418  | 0.9375  | 1.0000  |

### SUMMARY OF ROC CURVE:

Area = 0.8843

Std. Dev. (Area) = 0.0506

ESTIMATED BINORMAL ROC CURVE WITH ASYMMETRIC 95% CONFIDENCE  
INTERVAL:

| FPF   | TPF    | 95% Conf. Interv. |
|-------|--------|-------------------|
| 0.005 | 0.0004 | (0.0000, 0.5539)  |
| 0.010 | 0.0032 | (0.0000, 0.6484)  |
| 0.020 | 0.0221 | (0.0000, 0.7454)  |
| 0.030 | 0.0593 | (0.0000, 0.8011)  |
| 0.040 | 0.1109 | (0.0003, 0.8392)  |
| 0.050 | 0.1721 | (0.0013, 0.8675)  |
| 0.060 | 0.2385 | (0.0041, 0.8895)  |
| 0.070 | 0.3066 | (0.0098, 0.9073)  |
| 0.080 | 0.3741 | (0.0197, 0.9218)  |
| 0.090 | 0.4390 | (0.0349, 0.9339)  |
| 0.100 | 0.5004 | (0.0561, 0.9442)  |
| 0.110 | 0.5574 | (0.0831, 0.9528)  |
| 0.120 | 0.6098 | (0.1159, 0.9602)  |
| 0.130 | 0.6574 | (0.1535, 0.9666)  |
| 0.140 | 0.7004 | (0.1950, 0.9720)  |
| 0.150 | 0.7389 | (0.2392, 0.9766)  |
| 0.200 | 0.8745 | (0.4668, 0.9913)  |
| 0.250 | 0.9434 | (0.6494, 0.9973)  |
| 0.300 | 0.9759 | (0.7715, 0.9993)  |
| 0.400 | 0.9963 | (0.8975, 1.0000)  |
| 0.500 | 0.9996 | (0.9507, 1.0000)  |
| 0.600 | 1.0000 | (0.9760, 1.0000)  |
| 0.700 | 1.0000 | (0.9889, 1.0000)  |
| 0.800 | 1.0000 | (0.9956, 1.0000)  |
| 0.900 | 1.0000 | (0.9989, 1.0000)  |
| 0.950 | 1.0000 | (0.9997, 1.0000)  |

ESTIMATES OF EXPECTED OPERATING POINTS ON FITTED ROC CURVE:

| Expected<br>Operating Point<br>( FPF , TPF ) | 95% C.I. of<br>Lower Bound<br>( FPF , TPF ) | 95% C.I. of<br>Upper Bound<br>( FPF , TPF ) |
|----------------------------------------------|---------------------------------------------|---------------------------------------------|
| (0.0935, 0.4609)                             | (0.0260, 0.0424)                            | (0.2432, 0.9366)                            |
| (0.1627, 0.7817)                             | (0.0689, 0.2991)                            | (0.3147, 0.9814)                            |
| (0.2443, 0.9377)                             | (0.1252, 0.6354)                            | (0.4068, 0.9968)                            |
| (0.3268, 0.9850)                             | (0.1807, 0.8320)                            | (0.5061, 0.9996)                            |
| (0.3723, 0.9936)                             | (0.2124, 0.8964)                            | (0.5582, 0.9999)                            |

WARNINGS AND ERROR MESSAGES:

Chi-square goodness of fit not calculated because  
some expected cell frequencies are less than 5.

Chi-square goodness of fit not calculated because  
some expected cell frequencies are less than 5.

| FPF    | TPF    | Lower  | Upper  |
|--------|--------|--------|--------|
| 0.0000 | 0.0000 | 0.0000 | 0.0000 |
| 0.0050 | 0.0004 | 0.0000 | 0.5539 |
| 0.0100 | 0.0032 | 0.0000 | 0.6484 |
| 0.0200 | 0.0221 | 0.0000 | 0.7454 |
| 0.0300 | 0.0593 | 0.0000 | 0.8011 |
| 0.0400 | 0.1109 | 0.0003 | 0.8392 |
| 0.0500 | 0.1721 | 0.0013 | 0.8675 |
| 0.0600 | 0.2385 | 0.0041 | 0.8895 |
| 0.0700 | 0.3066 | 0.0098 | 0.9073 |
| 0.0800 | 0.3741 | 0.0197 | 0.9218 |
| 0.0900 | 0.4390 | 0.0349 | 0.9339 |
| 0.1000 | 0.5004 | 0.0561 | 0.9442 |
| 0.1100 | 0.5574 | 0.0831 | 0.9528 |
| 0.1200 | 0.6098 | 0.1159 | 0.9602 |
| 0.1300 | 0.6574 | 0.1535 | 0.9666 |
| 0.1400 | 0.7004 | 0.1950 | 0.9720 |
| 0.1500 | 0.7389 | 0.2392 | 0.9766 |
| 0.2000 | 0.8745 | 0.4668 | 0.9913 |
| 0.2500 | 0.9434 | 0.6494 | 0.9973 |

|        |        |        |        |
|--------|--------|--------|--------|
| 0.3000 | 0.9759 | 0.7715 | 0.9993 |
| 0.4000 | 0.9963 | 0.8975 | 1.0000 |
| 0.5000 | 0.9996 | 0.9507 | 1.0000 |
| 0.6000 | 1.0000 | 0.9760 | 1.0000 |
| 0.7000 | 1.0000 | 0.9889 | 1.0000 |
| 0.8000 | 1.0000 | 0.9956 | 1.0000 |
| 0.9000 | 1.0000 | 0.9989 | 1.0000 |
| 0.9500 | 1.0000 | 0.9997 | 1.0000 |
| 1.0000 | 1.0000 | 1.0000 | 1.0000 |

### LROC Data Input

OBSERVER:LB&TN  
CONDITION:MRvsCT  
REPLICATION:  
NDIST: 1  
NCAT: 6  
DISTRIBUTION: 0

|   |   |    |
|---|---|----|
| 1 | 0 | 10 |
| 2 | 0 | 3  |
| 3 | 0 | 0  |
| 4 | 0 | 6  |
| 5 | 0 | 4  |
| 6 | 0 | 2  |

DISTRIBUTION: 1

|   |    |    |
|---|----|----|
| 1 | 18 | 0  |
| 2 | 0  | 2  |
| 3 | 0  | 11 |
| 4 | 6  | 25 |
| 5 | 2  | 56 |
| 6 | 2  | 81 |

### LROC Results

OBSERVER:LB&TN  
CONDITION:MRvsCT  
REPLICATION:

NDIST: 1      Number of target distributions  
NCAT: 6      Number of rating categories  
NOLOC: 0      Number of categories without localization

Chance Correct Location (qset) values:

1  
0.000

DISTRIBUTION: 0      Non-target distribution

| Rating | Frequency |
|--------|-----------|
| 1      | 10        |
| 2      | 3         |
| 3      | 0         |
| 4      | 6         |
| 5      | 4         |
| 6      | 2         |

DISTRIBUTION: 1      Target distribution

| Rating | Non-hit | Hit |
|--------|---------|-----|
| 1      | 18      | 0   |
| 2      | 0       | 2   |
| 3      | 0       | 11  |
| 4      | 6       | 25  |
| 5      | 2       | 56  |
| 6      | 2       | 81  |

Procedure has estimates of model parameters

Number of iterations = 7  
Stopping index (tnet) = 0.00080599      lambda = 0.100000000000000E-06  
Number of distributions = 2

Mean of distributions

|         |        |        |
|---------|--------|--------|
| Fit     | 1.9874 | 0.0000 |
| Initial | 2.4366 | 0.0000 |

Sigma of distributions

|         |        |        |
|---------|--------|--------|
| Fit     | 1.6483 | 1.0000 |
| Initial | 2.0000 | 1.0000 |

|            |        |        |        |        |        |
|------------|--------|--------|--------|--------|--------|
| Boundaries |        |        |        |        |        |
| Fit        | 0.1822 | 0.3284 | 0.5970 | 1.2947 | 2.3549 |
| Initial    | 0.0463 | 0.1864 | 0.2338 | 0.8957 | 1.4464 |

Distribution parameter values

|               |         |         |
|---------------|---------|---------|
| Target dist # | 1       |         |
| Mean          | 1.98744 | 0.00000 |
| Std err       | 0.23245 | 0.00000 |
| Sigma         | 1.64826 | 1.00000 |
| Std err       | 0.24821 | 0.00000 |

|            |         |         |         |         |         |
|------------|---------|---------|---------|---------|---------|
| Boundaries | 0.18216 | 0.32844 | 0.59704 | 1.29473 | 2.35489 |
| Std err    | 0.14203 | 0.13720 | 0.13131 | 0.13987 | 0.23873 |

Used numerical integration from parameter values

|               |        |
|---------------|--------|
| Target dist # | 1      |
| AreaROC       | 0.8901 |
| std err       | 0.0146 |
| AreaLROC      | 0.7801 |
| Loc Accuracy  | 0.8487 |
| std err       | 0.0237 |

Direct calculation from parameter values

|            |        |
|------------|--------|
| Dloc       | 1.4579 |
| std err    | 0.1427 |
| Prob Local | 0.8487 |
| std err    | 0.0237 |

Moments from distribution parameters of LROC model

|               |        |         |
|---------------|--------|---------|
| Target dist # | 0      | 1       |
| Mean          | 0.0000 | 2.1292  |
| St. dev.      | 1.0060 | 1.4553  |
| Skew          | 0.0000 | 0.2922  |
| Kurtosis      | 0.1853 | -6.5201 |
| Implied d-a   | 0.0000 | 1.7054  |
| Implied Az    | 0.5000 | 0.8861  |

Loglikelihood and chi-squared

|             |            |            |
|-------------|------------|------------|
| logd1,logd2 | -392.29388 | -334.75824 |
| logL1,logL2 | 64.79968   | 16.44430   |
| chi1,chi2   | 61.33489   | 22.84165   |

Curves from fit distribution parameters

| False Pos | Tar 1  |        |
|-----------|--------|--------|
| 1.00000   | 1.0000 | 0.8487 |
| 0.99859   | 1.0000 | 0.8487 |
| 0.99733   | 1.0000 | 0.8487 |
| 0.99512   | 1.0000 | 0.8487 |
| 0.99140   | 1.0000 | 0.8487 |
| 0.98542   | 0.9999 | 0.8487 |
| 0.97614   | 0.9998 | 0.8486 |
| 0.96234   | 0.9996 | 0.8485 |
| 0.94262   | 0.9991 | 0.8483 |
| 0.91556   | 0.9983 | 0.8479 |
| 0.87990   | 0.9967 | 0.8471 |
| 0.83476   | 0.9940 | 0.8458 |
| 0.77989   | 0.9896 | 0.8436 |
| 0.71582   | 0.9829 | 0.8402 |
| 0.64398   | 0.9728 | 0.8349 |
| 0.56662   | 0.9586 | 0.8271 |
| 0.48662   | 0.9395 | 0.8163 |
| 0.40714   | 0.9147 | 0.8018 |
| 0.33133   | 0.8841 | 0.7830 |
| 0.26187   | 0.8476 | 0.7596 |
| 0.20076   | 0.8058 | 0.7314 |
| 0.14911   | 0.7594 | 0.6986 |

|         |        |        |
|---------|--------|--------|
| 0.10719 | 0.7094 | 0.6614 |
| 0.07452 | 0.6570 | 0.6205 |
| 0.05006 | 0.6034 | 0.5766 |
| 0.03247 | 0.5494 | 0.5306 |
| 0.02033 | 0.4960 | 0.4833 |
| 0.01228 | 0.4440 | 0.4358 |
| 0.00715 | 0.3939 | 0.3888 |
| 0.00401 | 0.3463 | 0.3432 |
| 0.00217 | 0.3014 | 0.2997 |
| 0.00113 | 0.2597 | 0.2587 |
| 0.00057 | 0.2214 | 0.2209 |
| 0.00000 | 0.0000 | 0.0000 |

Standard Error -- Correlation matrix

Mean and sigma part of matrix

|    |         |         |
|----|---------|---------|
|    | m2      | s2      |
| m2 | 0.23245 | 0.62965 |
| s2 | 0.62965 | 0.24821 |

Boundary part of matrix

|    |         |         |         |         |         |
|----|---------|---------|---------|---------|---------|
|    | b1      | b2      | b3      | b4      | b5      |
| b1 | 0.14203 | 0.90634 | 0.75935 | 0.42564 | 0.05911 |
| b2 | 0.90634 | 0.13720 | 0.83954 | 0.49071 | 0.11443 |
| b3 | 0.75935 | 0.83954 | 0.13131 | 0.62594 | 0.23905 |
| b4 | 0.42564 | 0.49071 | 0.62594 | 0.13987 | 0.64027 |
| b5 | 0.05911 | 0.11443 | 0.23905 | 0.64027 | 0.23873 |

Mean and sigma by boundary

|    |         |         |
|----|---------|---------|
|    | m2      | s2      |
| b1 | 0.13288 | -.30032 |
| b2 | 0.18338 | -.26014 |
| b3 | 0.29275 | -.15701 |
| b4 | 0.61223 | 0.25065 |
| b5 | 0.81157 | 0.71692 |
